# Supplementary material for: Liraglutide Reduces Both Atherosclerosis and Kidney Inflammation in Moderately Uremic LDLr-/- Mice
Source: PubMed Central journal article supplement (PMC5161477; doi:10.1371/journal.pone.0168396), 2016-12-16
Supplement: pone.0168396.s011.pdf [file pone.0168396.s011.pdf]

**S1 Table**

|                             | SHAM         | NX                |
|-----------------------------|--------------|-------------------|
| N                           | 15           | 17                |
| Body weight (g)             | 23.3 ± 0.3   | 22.1 ± 0.4        |
| P-urea (mmol/L)             | 8.1 ± 0.4    | 19.6 ± 1.0 ****   |
| P-creatinine (μmol/L)       | 14.8 ± 1.0   | 23.9 ± 0.8 ****   |
| P-cholesterol (mmol/L)      | 31.7 ± 1.7   | 34.1 ± 2.1        |
| P-phosphate                 | 2.3 ± 0.1    | 2.4 ± 0.2         |
| P-Ca <sup>2+</sup> (mmol/L) | 2.2 ± 0.02   | 2.6 ± 0.04 ****   |
| P-osteopontin               | 207.4 ± 11.9 | 437.9 ± 25.2 **** |

Results are depicted as mean±SEM. \*\*\*\*P< 0.0001 as determined by unpaired students t-test.
