# Supplementary material for: Liraglutide Reduces Both Atherosclerosis and Kidney Inflammation in Moderately Uremic LDLr-/- Mice
Source: PubMed Central journal article supplement (PMC5161477; doi:10.1371/journal.pone.0168396), 2016-12-16
Supplement: pone.0168396.s012.pdf [file pone.0168396.s012.pdf]

**S2 Table**

|                                | SHAM       | NX                      | NX LIRA                 |
|--------------------------------|------------|-------------------------|-------------------------|
| N                              | 14         | 14                      | 15                      |
| <b>Lira-treatment baseline</b> |            |                         |                         |
| Body weight (g)                | 20.4 ± 0.3 | 20.3 ± 0.5              | 19.8 ± 0.3              |
| P-urea (mmol/L)                | 10.3 ± 0.3 | 30.5 ± 2.6 <sup>a</sup> | 27.6 ± 2.3              |
| P-cholesterol (mmol/L)         | 6.5 ± 0.2  | 7.7 ± 0.2 <sup>b</sup>  | 7.3 ± 0.2               |
| P-phosphate                    | 1.9 ± 0.08 | 1.8 ± 0.05              | 1.8 ± 0.08              |
| <b>Termination</b>             |            |                         |                         |
| Body weight (g)                | 21.7 ± 0.3 | 21.2 ± 0.2              | 19.8 ± 0.3 <sup>c</sup> |
| P-urea (mmol/L)                | 9.4 ± 0.4  | 20.5 ± 1.4 <sup>a</sup> | 19.9 ± 1.6              |
| P-creatinine (μmol/L)          | 15.3 ± 1.3 | 24.1 ± 1.2 <sup>a</sup> | 20.6 ± 1.2              |
| P-cholesterol (mmol/L)         | 40.2 ± 1.3 | 40.7 ± 1.6              | 41.9 ± 2.7              |
| P-phosphate                    | 1.8 ± 0.09 | 1.9 ± 0.09              | 1.9 ± 0.11              |
| P- Ca <sup>2+</sup> (mmol/L)   | 2.2 ± 0.02 | 2.5 ± 0.03 <sup>a</sup> | 2.5 ± 0.04              |

Results are depicted as mean±SEM. Statistical analysis was determined by 1-way ANOVA followed by Sidak's multiple comparisons post-test.

<sup>a</sup>=\*\*\*\* (SHAM vs NX)

<sup>b</sup>=\*\*\* (SHAM vs NX)

<sup>c</sup>=\*\* (NX vs NX LIRA)
