# Supplementary material for: Liraglutide Reduces Both Atherosclerosis and Kidney Inflammation in Moderately Uremic LDLr-/- Mice
Source: PubMed Central journal article supplement (PMC5161477; doi:10.1371/journal.pone.0168396), 2016-12-16
Supplement: pone.0168396.s013.pdf [file pone.0168396.s013.pdf]

**S3 Table**

| Cytokine     | SHAM               | NX                 | NX LIRA            | NX rel. to SHAM<br>mean fold change | NX LIRA rel. to NX<br>mean fold change |
|--------------|--------------------|--------------------|--------------------|-------------------------------------|----------------------------------------|
| IFN $\gamma$ | 0.34 $\pm$ 0.06    | 0.85 $\pm$ 0.14    | 0.85 $\pm$ 0.08    | 2.50 $\pm$ 0.41 **                  | 1.01 $\pm$ 0.09                        |
| IL-10        | 20.90 $\pm$ 2.83   | 43.76 $\pm$ 4.64   | 33.12 $\pm$ 3.17   | 2.09 $\pm$ 0.22 ***                 | 0.76 $\pm$ 0.72                        |
| IL-5         | 2.45 $\pm$ 0.24    | 4.00 $\pm$ 0.41    | 5.82 $\pm$ 0.99    | 1.63 $\pm$ 0.17                     | 1.45 $\pm$ 0.25                        |
| IL-6         | 23.28 $\pm$ 2.85   | 37.53 $\pm$ 13.03  | 54.02 $\pm$ 14.42  | 1.61 $\pm$ 0.56                     | 1.44 $\pm$ 0.38                        |
| KC           | 153.80 $\pm$ 13.38 | 144.40 $\pm$ 11.48 | 165.70 $\pm$ 13.9  | 0.94 $\pm$ 0.07                     | 1.15 $\pm$ 0.10                        |
| TNF $\alpha$ | 24.36 $\pm$ 1.92   | 47.30 $\pm$ 3.55   | 44.07 $\pm$ 3.73   | 1.94 $\pm$ 0.15 ****                | 0.93 $\pm$ 0.08                        |
| MCP-1        | 983.10 $\pm$ 59.44 | 825.20 $\pm$ 53.01 | 968.40 $\pm$ 90.05 | 0.84 $\pm$ 0.05                     | 1.17 $\pm$ 0.11                        |
| OPN          | 252.30 $\pm$ 18.53 | 396.00 $\pm$ 23.87 | 391.00 $\pm$ 14.51 | 1.57 $\pm$ 0.09 *                   | 0.99 $\pm$ 0.04                        |

Plasma cytokine levels measured at termination of Study 2 are shown as absolute values in column 1-3 (pg/mL, OPN: ng/mL) as well as fold change of uremic (NX) mice relative to control (SHAM) mice (column 4) and liraglutide treated uremic mice (NX LIRA) relative to uremic (NX) mice (column 5). Depicted values are mean $\pm$ SEM. Statistical analysis was made by 1-way ANOVA followed by Sidak's multiple comparisons post-test. \*p<0.05, \*\*p<0.01, \*\*\*p<0.005, \*\*\*\*p<0.001. n=14-15 mice per group. OPN: Osteopontin, MCP-1: Monocyte Chemoattractant Protein-1, TNF $\alpha$ : Tumor necrosis factor alpha, KC: chemokine (C-X-C motif) ligand 1, IL-6: interleukin 6, IFN $\gamma$ : interferon gamma, IL-10: interleukin 10, IL-5: interleukin 5.
