# Supplementary material for: Liraglutide Reduces Both Atherosclerosis and Kidney Inflammation in Moderately Uremic LDLr-/- Mice
Source: PubMed Central journal article supplement (PMC5161477; doi:10.1371/journal.pone.0168396), 2016-12-16
Supplement: pone.0168396.s014.pdf [file pone.0168396.s014.pdf]

**S4 Table**

| <b>Gene name</b> | <b>Assay ID</b> |
|------------------|-----------------|
| Ace              | Mm00802048_m1   |
| Ager             | Mm01134790_g1   |
| Agt              | Mm00599662_m1   |
| Ccl12            | Mm01617100_m1   |
| Ccl2             | Mm00441242_m1   |
| Ccl5             | Mm01302427_m1   |
| Cdh1             | Mm01247357_m1   |
| Cdh5             | Mm00486938_m1   |
| Cdkn1a           | Mm04205640_g1   |
| Col1a1           | Mm00801666_g1   |
| Col1a2           | Mm00483888_m1   |
| Col3a1           | Mm01254476_m1   |
| Ctgf             | Mm01192932_g1   |
| Cxcl15           | Mm00441263_m1   |
| Fn1              | Mm01256744_m1   |
| Grem1            | Mm00488615_s1   |
| Havcr1           | Mm00506686_m1   |
| Hif1a            | Mm00468869_m1   |
| Hspg2            | Mm01181173_g1   |
| Icam1            | Mm00516023_m1   |
| Itga1            | Mm01306375_m1   |
| Itga3            | Mm00442910_m1   |
| Itga5            | Mm00439797_m1   |
| Kcp              | Mm01159615_m1   |
| Lamc1            | Mm00711820_m1   |
| Lcn2             | Mm01324470_m1   |
| Mmp2             | Mm00439498_m1   |
| Nos2             | Mm00440502_m1   |
| Nos3             | Mm00435217_m1   |
| Nphs1            | Mm00497828_m1   |
| Pdgfb            | Mm00440677_m1   |
| Pdgfrb           | Mm00435546_m1   |
| Serpine1         | Mm00435860_m1   |
| Snai1            | Mm00441533_g1   |
| Tgfb1            | Mm01178820_m1   |
| Tgfb2            | Mm00436955_m1   |
| Tgfb3            | Mm00436960_m1   |
| Timp1            | Mm00441818_m1   |
| Timp2            | Mm00441825_m1   |
| Tlr2             | Mm00442346_m1   |
| Tnf              | Mm00443258_m1   |
| Vcam1            | Mm01320970_m1   |
| Vim              | Mm01333430_m1   |
| Wt1              | Mm00460570_m1   |
| Rpl27            | Mm01245874_g1   |
| Rps13            | Mm00850011_g1   |
| Ubc              | Mm02525934_g1   |

Primer ID list
